# Supplementary material for: Identification of Canine Pyometra-Associated Metabolites Using Untargeted Metabolomics
Source: MDPI journal article supplement (doi:10.3390/ijms232214161), 2022-11-16
Supplement: s1 [file s1]

**Table S4.** The enriched pathways of differential endometrial metabolism in the negative ionization mode.

| MapTitle                             | P value | x      | y  | n  | N   | Enrich Direct | MetaIDs                                                                                                                                                                                                                                                                                                                                                                                                                |
|--------------------------------------|---------|--------|----|----|-----|---------------|------------------------------------------------------------------------------------------------------------------------------------------------------------------------------------------------------------------------------------------------------------------------------------------------------------------------------------------------------------------------------------------------------------------------|
| Glycerophospholipid metabolism       | 0.065   | 3      | 4  | 31 | 111 | Over          | Phosphocholine; O-Phosphorylethanolamine; Dihydroxyacetone phosphate                                                                                                                                                                                                                                                                                                                                                   |
| Serotonergic synapse                 | 0.065   | 3      | 4  | 31 | 111 | Over          | Arachidonic acid; Thromboxane B2; Prostaglandin H2                                                                                                                                                                                                                                                                                                                                                                     |
| Glycolysis / Gluconeogenesis         | 0.076   | 2      | 2  | 31 | 111 | Over          | Phosphoenolpyruvic acid; Dihydroxyacetone phosphate                                                                                                                                                                                                                                                                                                                                                                    |
| Starch and sucrose metabolism        | 0.076   | 2      | 2  | 31 | 111 | Over          | $\alpha,\alpha$ -Trehalose; D-Glucose 6-phosphate                                                                                                                                                                                                                                                                                                                                                                      |
| Platelet activation                  | 0.076   | 2      | 2  | 31 | 111 | Over          | Arachidonic acid; Prostaglandin H2                                                                                                                                                                                                                                                                                                                                                                                     |
| Retrograde endocannabinoid signaling | 0.076   | 2      | 2  | 31 | 111 | Over          | Arachidonic acid; Prostaglandin H2                                                                                                                                                                                                                                                                                                                                                                                     |
| Dopaminergic synapse                 | 0.076   | 2      | 2  | 31 | 111 | Over          | Homovanillic acid; Levodopa                                                                                                                                                                                                                                                                                                                                                                                            |
| Prolactin signaling pathway          | 0.076   | 2      | 2  | 31 | 111 | Over          | Levodopa; D-Glucose 6-phosphate                                                                                                                                                                                                                                                                                                                                                                                        |
| Thyroid hormone synthesis            | 0.076   | 2      | 2  | 31 | 111 | Over          | Nicotinamide adenine dinucleotide phosphate; D-Glucose 6-phosphate                                                                                                                                                                                                                                                                                                                                                     |
| Arachidonic acid metabolism          | 0.132   | 3      | 5  | 31 | 111 | Over          | Arachidonic acid; Thromboxane B2; Prostaglandin H2                                                                                                                                                                                                                                                                                                                                                                     |
| Metabolic pathways                   | 0.17    | 2<br>6 | 81 | 31 | 111 | Over          | Arachidonic acid; 4-Guanidinobutanoate; Cholic acid; 4-Methylphenol; trans-Cinnamic acid; Salicylic acid; o-Toluic Acid; Phenylpyruvic acid; Deoxyguanosine; Uridine; Phosphocholine; Homovanillic acid; Nicotinamide adenine dinucleotide phosphate; $\alpha,\alpha$ -Trehalose; Thromboxane B2; Phosphoenolpyruvic acid; Levodopa; D-Ribulose 5-phosphate; D-Sedoheptulose 7-phosphate; Hypoxanthine; Vitamin B2; D- |

|                                                     |       |   |   |    |     |      |                                                                                                          |
|-----------------------------------------------------|-------|---|---|----|-----|------|----------------------------------------------------------------------------------------------------------|
|                                                     |       |   |   |    |     |      | Glucose 6-phosphate; Prostaglandin H2; Thymidine; O-Phosphorylethanolamine; Dihydroxyacetone phosphate   |
| Pentose and glucuronate interconversions            | 0.188 | 2 | 3 | 31 | 111 | Over | D-Ribulose 5-phosphate; Dihydroxyacetone phosphate                                                       |
| Phenylalanine, tyrosine and tryptophan biosynthesis | 0.188 | 2 | 3 | 31 | 111 | Over | Phenylpyruvic acid; Phosphoenolpyruvic acid                                                              |
| Inositol phosphate metabolism                       | 0.188 | 2 | 3 | 31 | 111 | Over | D-Glucose 6-phosphate; Dihydroxyacetone phosphate                                                        |
| Riboflavin metabolism                               | 0.188 | 2 | 3 | 31 | 111 | Over | D-Ribulose 5-phosphate; Vitamin B2                                                                       |
| Ovarian steroidogenesis                             | 0.188 | 2 | 3 | 31 | 111 | Over | Arachidonic acid; 2-Hydroxyestradiol                                                                     |
| Oxytocin signaling pathway                          | 0.188 | 2 | 3 | 31 | 111 | Over | Arachidonic acid; Prostaglandin H2                                                                       |
| Carbon metabolism                                   | 0.216 | 4 | 8 | 31 | 111 | Over | Phosphoenolpyruvic acid; D-Ribulose 5-phosphate; D-Sedoheptulose 7-phosphate; Dihydroxyacetone phosphate |
| Bile secretion                                      | 0.263 | 4 | 9 | 31 | 111 | Over | Cholic acid; Salicylic acid; Ouabain; Thromboxane B2                                                     |
| Fructose and mannose metabolism                     | 0.279 | 1 | 1 | 31 | 111 | Over | Dihydroxyacetone phosphate                                                                               |
| Ubiquinone and other terpenoid-quinone biosynthesis | 0.279 | 1 | 1 | 31 | 111 | Over | trans-Cinnamic acid                                                                                      |
| Phosphonate and phosphinate metabolism              | 0.279 | 1 | 1 | 31 | 111 | Over | Phosphoenolpyruvic acid                                                                                  |
| Glycerolipid metabolism                             | 0.279 | 1 | 1 | 31 | 111 | Over | Dihydroxyacetone phosphate                                                                               |
| Linoleic acid metabolism                            | 0.279 | 1 | 1 | 31 | 111 | Over | Arachidonic acid                                                                                         |
| Sphingolipid metabolism                             | 0.279 | 1 | 1 | 31 | 111 | Over | O-Phosphorylethanolamine                                                                                 |
| Propanoate metabolism                               | 0.279 | 1 | 1 | 31 | 111 | Over | Dihydroxyacetone phosphate                                                                               |
| Folate biosynthesis                                 | 0.279 | 1 | 1 | 31 | 111 | Over | Sepiapterin                                                                                              |

|                                                  |       |   |   |    |     |      |                                                         |
|--------------------------------------------------|-------|---|---|----|-----|------|---------------------------------------------------------|
| Sphingolipid signaling pathway                   | 0.279 | 1 | 1 | 31 | 111 | Over | O-Phosphorylethanolamine                                |
| Necroptosis                                      | 0.279 | 1 | 1 | 31 | 111 | Over | Arachidonic acid                                        |
| Vascular smooth muscle contraction               | 0.279 | 1 | 1 | 31 | 111 | Over | Arachidonic acid                                        |
| Fc gamma R-mediated phagocytosis                 | 0.279 | 1 | 1 | 31 | 111 | Over | Arachidonic acid                                        |
| Long-term depression                             | 0.279 | 1 | 1 | 31 | 111 | Over | Arachidonic acid                                        |
| Inflammatory mediator regulation of TRP channels | 0.279 | 1 | 1 | 31 | 111 | Over | Arachidonic acid                                        |
| Insulin secretion                                | 0.279 | 1 | 1 | 31 | 111 | Over | D-Glucose 6-phosphate                                   |
| GnRH signaling pathway                           | 0.279 | 1 | 1 | 31 | 111 | Over | Arachidonic acid                                        |
| Carbohydrate digestion and absorption            | 0.279 | 1 | 1 | 31 | 111 | Over | D-Glucose 6-phosphate                                   |
| Parkinson's disease                              | 0.279 | 1 | 1 | 31 | 111 | Over | Levodopa                                                |
| Cocaine addiction                                | 0.279 | 1 | 1 | 31 | 111 | Over | Levodopa                                                |
| Amphetamine addiction                            | 0.279 | 1 | 1 | 31 | 111 | Over | Levodopa                                                |
| Alcoholism                                       | 0.279 | 1 | 1 | 31 | 111 | Over | Levodopa                                                |
| Pentose phosphate pathway                        | 0.311 | 2 | 4 | 31 | 111 | Over | D-Ribulose 5-phosphate; D-Sedoheptulose 7-phosphate     |
| Tyrosine metabolism                              | 0.311 | 2 | 4 | 31 | 111 | Over | Homovanillic acid; Levodopa                             |
| Phenylalanine metabolism                         | 0.346 | 3 | 6 | 31 | 111 | Over | trans-Cinnamic acid; Salicylic acid; Phenylpyruvic acid |
| Primary bile acid biosynthesis                   | 0.482 | 1 | 2 | 31 | 111 | Over | Cholic acid                                             |
| Lysine degradation                               | 0.482 | 1 | 2 | 31 | 111 | Over | Glutaric Acid                                           |
| Neomycin, kanamycin and gentamicin biosynthesis  | 0.482 | 1 | 2 | 31 | 111 | Over | D-Glucose 6-phosphate                                   |

|                                        |       |   |    |    |     |      |                                                                                                                              |
|----------------------------------------|-------|---|----|----|-----|------|------------------------------------------------------------------------------------------------------------------------------|
| alpha-Linolenic acid metabolism        | 0.482 | 1 | 2  | 31 | 111 | Over | Traumatic acid                                                                                                               |
| Ferroptosis                            | 0.482 | 1 | 2  | 31 | 111 | Over | Arachidonic acid                                                                                                             |
| Fc epsilon RI signaling pathway        | 0.482 | 1 | 2  | 31 | 111 | Over | Arachidonic acid                                                                                                             |
| Regulation of lipolysis in adipocytes  | 0.482 | 1 | 2  | 31 | 111 | Over | Arachidonic acid                                                                                                             |
| Choline metabolism in cancer           | 0.482 | 1 | 2  | 31 | 111 | Over | Phosphocholine                                                                                                               |
| Biosynthesis of amino acids            | 0.511 | 5 | 13 | 31 | 111 | Over | Phenylpyruvic acid; Phosphoenolpyruvic acid; D-Ribulose 5-phosphate; D-Sedoheptulose 7-phosphate; Dihydroxyacetone phosphate |
| Aldosterone synthesis and secretion    | 0.617 | 2 | 5  | 31 | 111 | Over | Arachidonic acid; Nicotinamide adenine dinucleotide phosphate                                                                |
| Nicotinate and nicotinamide metabolism | 0.671 | 2 | 6  | 31 | 111 | Over | Nicotinamide adenine dinucleotide phosphate; Dihydroxyacetone phosphate                                                      |
| Galactose metabolism                   | 1     | 1 | 3  | 31 | 111 | Over | Dihydroxyacetone phosphate                                                                                                   |
| Fatty acid degradation                 | 1     | 1 | 3  | 31 | 111 | Over | Glutaric Acid                                                                                                                |
| Arginine and proline metabolism        | 1     | 1 | 3  | 31 | 111 | Over | 4-Guanidinobutanoate                                                                                                         |
| Pyruvate metabolism                    | 1     | 1 | 3  | 31 | 111 | Over | Phosphoenolpyruvic acid                                                                                                      |
| Vitamin B6 metabolism                  | 1     | 1 | 3  | 31 | 111 | Over | D-Ribulose 5-phosphate                                                                                                       |
| Insulin resistance                     | 1     | 1 | 3  | 31 | 111 | Over | D-Glucose 6-phosphate                                                                                                        |
| Central carbon metabolism in cancer    | 1     | 1 | 3  | 31 | 111 | Over | D-Glucose 6-phosphate                                                                                                        |
| Pyrimidine metabolism                  | 1     | 2 | 7  | 31 | 111 | Over | Uridine; Thymidine                                                                                                           |

---

Map Title: Enriched KEGG pathway name; P value: P value of enrichment analysis; X: Number of differential metabolites associated with this pathway; y: Number of background (all) metabolites associated with this pathway; n: Number of differential metabolites annotated by KEGG; N: Number of background (all) metabolites of KEGG annotation; Enrich Direct: Enrichment direction, Over represents enrichment, i.e.  $x/n > y/N$ ; Meta IDs: List of enriched metabolites.
