# Supplementary material for: Identification of Canine Pyometra-Associated Metabolites Using Untargeted Metabolomics
Source: MDPI journal article supplement (doi:10.3390/ijms232214161), 2022-11-16
Supplement: s1 [file s1]

**Table S1.** Differential metabolites identified in positive ion mode of endometrium of diseased and healthy dogs.

| Name                                                                  | Formula        | Molecular Weight | RT [min] | FC   | log2FC | P value | ROC  | VIP  | Up/ Down |
|-----------------------------------------------------------------------|----------------|------------------|----------|------|--------|---------|------|------|----------|
| Kynurenic acid                                                        | C10H7NO3       | 189.04           | 5.37     | 8.27 | 3.05   | 0.00    | 0.95 | 2.30 | up       |
| Acetylcysteine                                                        | C5H9NO3S       | 163.03           | 1.39     | 2.54 | 1.34   | 0.00    | 0.92 | 2.07 | up       |
| Isoquinoline                                                          | C9H7N          | 129.06           | 5.58     | 3.51 | 1.81   | 0.00    | 0.91 | 1.99 | up       |
| 3-[4-(3,5-dichloro-4-pyridinyl)piperazino]-1,1,1-trifluoro-2-propanol | C12H14Cl2F3N3O | 343.05           | 2.44     | 0.29 | -1.77  | 0.00    | 0.93 | 2.01 | down     |
| Leucylproline                                                         | C11H20N2O3     | 228.15           | 5.03     | 5.69 | 2.51   | 0.00    | 0.89 | 1.91 | up       |
| L-Cysteine-glutathione gisulfide                                      | C13H22N4O8S2   | 426.09           | 1.36     | 0.54 | -0.88  | 0.00    | 0.91 | 2.02 | down     |
| Beta-Muricholic acid                                                  | C24H40O5       | 408.29           | 7.45     | 8.78 | 3.13   | 0.00    | 0.88 | 2.09 | up       |
| L-Adrenaline                                                          | C9H13NO3       | 183.09           | 5.02     | 3.38 | 1.76   | 0.00    | 0.85 | 2.02 | up       |
| 1-(3-methoxy-2-nitrostyryl)pyrrolidine                                | C13H16N2O3     | 496.23           | 4.79     | 4.60 | 2.20   | 0.00    | 0.90 | 1.91 | up       |
| Kanosamine                                                            | C6H13NO5       | 179.08           | 4.94     | 2.61 | 1.38   | 0.00    | 0.88 | 1.87 | up       |
| 1-(2-furyl)pentane-1,4-dione                                          | C9H10O3        | 188.05           | 5.66     | 9.42 | 3.24   | 0.00    | 0.90 | 1.93 | up       |
| QKK                                                                   | C17H34N6O5     | 385.23           | 4.98     | 2.29 | 1.19   | 0.00    | 0.83 | 1.86 | up       |
| N2,N2-Dimethylguanosine                                               | C12H17N5O5     | 311.12           | 4.94     | 2.45 | 1.29   | 0.00    | 0.86 | 1.81 | up       |
| Radicinin                                                             | C12H12O5       | 258.05           | 5.79     | 0.22 | -2.20  | 0.00    | 0.89 | 2.01 | down     |
| 5-Methoxyindole-3-Carbaldehyde                                        | C10H9NO2       | 175.06           | 5.69     | 1.68 | 0.75   | 0.00    | 0.87 | 1.79 | up       |
| UDP                                                                   | C9H14N2O12P2   | 404.00           | 1.82     | 0.25 | -2.02  | 0.00    | 0.88 | 1.91 | down     |
| DL-Panthenol                                                          | C9H19NO4       | 205.13           | 1.38     | 3.67 | 1.87   | 0.00    | 0.84 | 1.77 | up       |
| 2-[(3S)-1-Benzyl-3-pyrrolidinyl]-1,3-benzothiazole                    | C18H18N2S      | 294.12           | 4.92     | 2.09 | 1.06   | 0.00    | 0.86 | 1.79 | up       |
| T-2 Triol                                                             | C20H30O7       | 382.20           | 7.45     | 0.01 | -6.65  | 0.00    | 0.89 | 1.95 | down     |

|                                                            |              |        |      |      |       |      |      |      |      |
|------------------------------------------------------------|--------------|--------|------|------|-------|------|------|------|------|
| LysoPC 12:1                                                | C20H36NO7P   | 433.22 | 4.76 | 3.93 | 1.97  | 0.00 | 0.83 | 1.90 | up   |
| Biopterin                                                  | C9H11N5O3    | 237.09 | 6.07 | 0.52 | -0.95 | 0.00 | 0.88 | 1.77 | down |
| Octyl hydrogen phthalate                                   | C16H22O4     | 256.17 | 6.72 | 2.09 | 1.06  | 0.00 | 0.88 | 1.74 | up   |
| Valylproline                                               | C10H18N2O3   | 428.26 | 4.77 | 2.41 | 1.27  | 0.00 | 0.84 | 1.73 | up   |
| D-3-Phenyllactic acid                                      | C9H10O3      | 166.06 | 5.67 | 4.49 | 2.17  | 0.00 | 0.88 | 1.79 | up   |
| SDB-006 N-phenyl analog                                    | C20H22N2O    | 612.35 | 4.67 | 3.32 | 1.73  | 0.00 | 0.82 | 1.73 | up   |
| Tributyl citrate                                           | C18H32O7     | 360.21 | 7.45 | 0.02 | -5.95 | 0.00 | 0.93 | 1.88 | down |
| 2-(2-amino-3-methylbutanamido)-3-phenylpropanoic acid      | C14H20N2O3   | 264.15 | 5.27 | 2.27 | 1.18  | 0.00 | 0.83 | 1.73 | up   |
| 4-chloro-5-morpholino-2-quinoxalin-2-ylpyridazin-3(2H)-one | C16H14ClN5O2 | 343.08 | 2.01 | 0.48 | -1.05 | 0.00 | 0.84 | 1.67 | down |
| D-Fructose 6-phosphate                                     | C6H13O9P     | 260.03 | 1.31 | 0.40 | -1.34 | 0.00 | 0.83 | 1.64 | down |
| KLK                                                        | C18H37N5O4   | 369.27 | 9.99 | 5.06 | 2.34  | 0.00 | 0.83 | 1.65 | up   |
| DL-Carnitine                                               | C7H15NO3     | 161.11 | 1.43 | 2.99 | 1.58  | 0.00 | 0.82 | 1.65 | up   |
| Asp-Phe                                                    | C13H16N2O5   | 280.11 | 5.02 | 1.72 | 0.78  | 0.00 | 0.83 | 1.66 | up   |
| Isobutyryl carnitine                                       | C11H21NO4    | 231.15 | 5.15 | 4.42 | 2.14  | 0.00 | 0.82 | 1.62 | up   |
| gamma-Glutamylglutamine                                    | C10H17N3O6   | 275.11 | 1.37 | 3.35 | 1.75  | 0.00 | 0.81 | 1.61 | up   |
| L(-)-Carnitine                                             | C7H15NO3     | 161.11 | 1.29 | 2.64 | 1.40  | 0.00 | 0.82 | 1.59 | up   |
| 4-(4-methoxyphenyl)-6-pyridin-4-yl-1,3,5-triazin-2(3H)-one | C15H12N4O2   | 318.05 | 6.04 | 0.57 | -0.82 | 0.00 | 0.83 | 1.58 | down |
| 3-(3,4,5-trimethoxyphenyl)propanoic acid                   | C12H16O5     | 222.09 | 5.89 | 2.27 | 1.18  | 0.00 | 0.84 | 1.60 | up   |
| 6-methyl-4-(morpholinomethyl)-2H-chromen-2-one             | C15H17NO3    | 259.12 | 6.13 | 0.53 | -0.91 | 0.00 | 0.80 | 1.60 | down |
| 5α-Dihydrotestosterone glucuronide                         | C25H38O8     | 466.25 | 6.06 | 0.56 | -0.84 | 0.00 | 0.79 | 1.61 | down |
| Glycyl-L-leucine                                           | C8H16N2O3    | 188.12 | 4.68 | 3.17 | 1.67  | 0.00 | 0.79 | 1.60 | up   |

|                                                    |             |        |       |       |       |      |      |      |      |
|----------------------------------------------------|-------------|--------|-------|-------|-------|------|------|------|------|
| Gelsemine                                          | C20H22N2O2  | 322.16 | 5.25  | 66.72 | 6.06  | 0.00 | 0.84 | 1.62 | up   |
| Thr-Leu                                            | C10H20N2O4  | 232.14 | 5.07  | 1.64  | 0.71  | 0.00 | 0.80 | 1.60 | up   |
| 2,4-Dimethylbenzaldehyde                           | C9H10O      | 134.07 | 6.35  | 1.52  | 0.60  | 0.00 | 0.84 | 1.54 | up   |
| PC (22:6e/5:0)                                     | C35H60NO7P  | 637.40 | 9.27  | 0.56  | -0.82 | 0.00 | 0.83 | 1.54 | down |
| Acetylcholine                                      | C7H15NO2    | 145.11 | 1.34  | 0.56  | -0.85 | 0.00 | 0.81 | 1.62 | down |
| 8,15-Dihete                                        | C20H32O4    | 336.23 | 5.97  | 0.43  | -1.21 | 0.00 | 0.79 | 1.66 | down |
| MNK                                                | C15H29N5O5S | 391.19 | 5.12  | 0.41  | -1.28 | 0.00 | 0.79 | 1.88 | down |
| SPH                                                | C14H21N5O5  | 321.14 | 5.04  | 0.36  | -1.48 | 0.00 | 0.82 | 1.56 | down |
| Deoxyadenosine                                     | C10H13N5O3  | 251.10 | 1.48  | 0.65  | -0.63 | 0.00 | 0.81 | 1.55 | down |
| N-Acetyl-L-leucine                                 | C8H15NO3    | 173.11 | 5.61  | 2.19  | 1.13  | 0.00 | 0.80 | 1.58 | up   |
| 2-methyl-2,3,4,5-tetrahydro-1,5-benzoxazepin-4-one | C10H11NO2   | 159.07 | 5.15  | 1.69  | 0.75  | 0.00 | 0.79 | 1.58 | up   |
| Gly-Tyr                                            | C11H14N2O4  | 238.09 | 3.01  | 1.69  | 0.76  | 0.00 | 0.78 | 1.59 | up   |
| L-Threonic acid-1,4-lactone                        | C4H6O4      | 118.03 | 1.97  | 0.66  | -0.61 | 0.00 | 0.80 | 1.54 | down |
| HPH                                                | C17H23N7O4  | 778.36 | 4.89  | 2.04  | 1.03  | 0.00 | 0.78 | 1.50 | up   |
| 5-(2,5-dihydroxyhexyl)oxolan-2-one                 | C10H18O4    | 224.10 | 5.69  | 1.90  | 0.92  | 0.00 | 0.82 | 1.52 | up   |
| N1-(1H-indol-4-yl)cyclohexane-1-carboxamide        | C15H18N2O   | 242.14 | 6.99  | 0.44  | -1.19 | 0.00 | 0.82 | 1.60 | down |
| $\alpha$ -Aspartylphenylalanine                    | C13H16N2O5  | 280.11 | 5.20  | 4.01  | 2.00  | 0.00 | 0.78 | 1.52 | up   |
| Riboflavin                                         | C17H20N4O6  | 376.14 | 5.32  | 2.77  | 1.47  | 0.00 | 0.79 | 1.51 | up   |
| Ala-Leu                                            | C9H18N2O3   | 202.13 | 4.92  | 1.71  | 0.78  | 0.00 | 0.80 | 1.62 | up   |
| PS (19:2/19:2)                                     | C44H78NO10P | 811.54 | 11.77 | 0.34  | -1.55 | 0.00 | 0.80 | 1.51 | down |
| LQH                                                | C17H28N6O5  | 396.22 | 5.63  | 0.50  | -1.01 | 0.00 | 0.77 | 1.71 | down |
| 5,6-dihydroxyindole                                | C8H7NO2     | 149.05 | 4.74  | 1.66  | 0.73  | 0.00 | 0.78 | 1.49 | up   |
| 2-(acetylamino)-3-(1H-indol-3-yl)propanoic acid    | C13H14N2O3  | 246.10 | 5.57  | 1.87  | 0.90  | 0.00 | 0.77 | 1.47 | up   |

|                                                           |             |        |      |       |       |      |      |      |      |
|-----------------------------------------------------------|-------------|--------|------|-------|-------|------|------|------|------|
| SMK                                                       | C14H28N4O5S | 324.18 | 5.17 | 1.58  | 0.66  | 0.01 | 0.80 | 1.56 | up   |
| PC (20:5e/4:0)                                            | C32H56NO7P  | 597.38 | 9.61 | 2.61  | 1.38  | 0.01 | 0.78 | 1.48 | up   |
| N3,N4-Dimethyl-L-arginine ethyl                           | C8H18N4O2   | 202.14 | 1.55 | 2.19  | 1.13  | 0.01 | 0.81 | 1.50 | up   |
| 4-(((3-morpholinopropyl)amino)carbothioyl)amino)benzoate  | C17H25N3O3S | 373.15 | 4.67 | 2.70  | 1.43  | 0.01 | 0.78 | 1.46 | up   |
| Hydrocortisone acetate                                    | C23H32O6    | 404.22 | 9.32 | 1.51  | 0.60  | 0.01 | 0.80 | 1.46 | up   |
| 3-(3,4-Dihydroxyphenyl)-2-Methylalanine                   | C10H13NO4   | 211.08 | 3.92 | 6.61  | 2.72  | 0.01 | 0.79 | 1.50 | up   |
| 2-Aminoacetophenone                                       | C8H9NO      | 135.07 | 4.85 | 2.08  | 1.06  | 0.01 | 0.80 | 1.45 | up   |
| 4-Hydroxyisoleucine                                       | C6H13NO3    | 147.09 | 1.40 | 1.82  | 0.86  | 0.01 | 0.81 | 1.46 | up   |
| 4-hydroxy-5,8-dimethylquinoline-3-carboxylic acid         | C12H11NO3   | 217.07 | 5.29 | 3.69  | 1.88  | 0.01 | 0.78 | 1.42 | up   |
| 6-Keto-prostaglandin f1alpha                              | C20H34O6    | 370.24 | 5.94 | 0.65  | -0.62 | 0.01 | 0.82 | 1.43 | down |
| Gly-Val                                                   | C7H14N2O3   | 174.10 | 2.06 | 3.19  | 1.67  | 0.01 | 0.78 | 1.49 | up   |
| VLH                                                       | C17H29N5O4  | 367.22 | 5.55 | 0.61  | -0.70 | 0.01 | 0.77 | 1.44 | down |
| Leukotriene B4 Ethanolamide                               | C22H37NO4   | 401.25 | 8.83 | 2.43  | 1.28  | 0.01 | 0.84 | 1.55 | up   |
| 6-Methylquinoline                                         | C10H9N      | 143.07 | 5.15 | 1.64  | 0.72  | 0.01 | 0.77 | 1.46 | up   |
| N6,N6,N6-Trimethyl-L-lysine                               | C9H20N2O2   | 188.15 | 1.20 | 0.58  | -0.79 | 0.01 | 0.74 | 1.44 | down |
| XLR11 N-(2-fluoropentyl) isomer                           | C21H28FNO   | 329.22 | 5.59 | 2.89  | 1.53  | 0.01 | 0.76 | 1.41 | up   |
| 2-[(3S)-1-(2-Methylbenzyl)-3-pyrrolidiny]-1,3-benzoxazole | C19H20N2O   | 292.15 | 5.26 | 56.05 | 5.81  | 0.01 | 0.73 | 1.45 | up   |
| 4-Guanidinobutyric acid                                   | C5H11N3O2   | 145.09 | 1.72 | 58.54 | 5.87  | 0.01 | 0.77 | 1.41 | up   |
| ACar 12:3                                                 | C19H32NO4   | 337.22 | 5.84 | 2.48  | 1.31  | 0.01 | 0.83 | 1.40 | up   |
| Hypoglycin A                                              | C7H11NO2    | 141.08 | 1.41 | 3.38  | 1.76  | 0.01 | 0.77 | 1.43 | up   |
| All-Trans-13,14-Dihydroretinol                            | C20H32O     | 288.25 | 9.49 | 5.74  | 2.52  | 0.01 | 0.81 | 1.40 | up   |

|                                                         |              |        |       |       |       |      |      |      |      |
|---------------------------------------------------------|--------------|--------|-------|-------|-------|------|------|------|------|
| 1-Methyladenosine                                       | C11H15N5O4   | 281.11 | 1.88  | 1.82  | 0.86  | 0.01 | 0.76 | 1.44 | up   |
| Tomatidine                                              | C27H45NO2    | 415.35 | 5.89  | 0.37  | -1.45 | 0.01 | 0.89 | 1.59 | down |
| N1-(1,3-thiazol-2-yl)-2-(1-adamantyl)acetamide          | C15H20N2OS   | 276.13 | 6.86  | 0.27  | -1.88 | 0.01 | 0.88 | 1.62 | down |
| Phosphoethanolamine                                     | C2H8NO4P     | 141.02 | 1.31  | 0.62  | -0.69 | 0.01 | 0.74 | 1.41 | down |
| Norfenefrine                                            | C8H11NO2     | 153.08 | 3.21  | 29.20 | 4.87  | 0.01 | 0.80 | 1.41 | up   |
| tert-Butyl N-[1-(aminocarbonyl)-3-methylbutyl]carbamate | C11H22N2O3   | 230.16 | 5.16  | 2.01  | 1.01  | 0.01 | 0.77 | 1.45 | up   |
| N-(4-chlorophenyl)-N'-(2-phenoxyphenyl)urea             | C19H15ClN2O2 | 360.07 | 1.39  | 1.77  | 0.82  | 0.01 | 0.83 | 1.35 | up   |
| 5-Methyl-dl-tryptophan                                  | C12H14N2O2   | 218.11 | 5.29  | 2.09  | 1.06  | 0.01 | 0.76 | 1.36 | up   |
| Val-Ser                                                 | C8H16N2O4    | 204.11 | 2.46  | 1.89  | 0.92  | 0.01 | 0.77 | 1.48 | up   |
| N-Acetylmethionine                                      | C7H13NO3S    | 191.06 | 5.26  | 1.63  | 0.70  | 0.01 | 0.71 | 1.38 | up   |
| Pyridoxine                                              | C8H11NO3     | 169.07 | 5.01  | 1.62  | 0.70  | 0.01 | 0.76 | 1.36 | up   |
| Prostaglandin K2                                        | C20H30O5     | 332.20 | 7.62  | 2.57  | 1.36  | 0.01 | 0.77 | 1.34 | up   |
| PC (18:3e/4:0)                                          | C30H56NO7P   | 573.38 | 9.73  | 1.80  | 0.85  | 0.01 | 0.76 | 1.40 | up   |
| 19-Nortestosterone                                      | C18H26O2     | 274.19 | 5.18  | 7.24  | 2.86  | 0.01 | 0.73 | 1.39 | up   |
| Isopropyl myristate                                     | C17H34O2     | 287.28 | 6.79  | 0.45  | -1.15 | 0.01 | 0.86 | 1.57 | down |
| UR-144 N-(2-hydroxypentyl) metabolite                   | C21H29NO2    | 327.22 | 5.28  | 1.59  | 0.67  | 0.01 | 0.78 | 1.39 | up   |
| LysoPC 18:0                                             | C26H54NO7P   | 523.36 | 9.10  | 0.59  | -0.76 | 0.01 | 0.77 | 1.39 | down |
| gamma-Glutamylleucine                                   | C11H20N2O5   | 260.14 | 5.32  | 1.80  | 0.85  | 0.01 | 0.74 | 1.36 | up   |
| Glycerol-3-phosphate                                    | C3H9O6P      | 172.01 | 1.45  | 0.30  | -1.73 | 0.01 | 0.76 | 1.31 | down |
| Verapamil hydrochloride                                 | C27H38N2O4   | 454.29 | 9.80  | 2.72  | 1.44  | 0.01 | 0.75 | 1.31 | up   |
| PC (20:3e/20:4)                                         | C48H84NO7P   | 817.59 | 11.53 | 2.85  | 1.51  | 0.01 | 0.74 | 1.31 | up   |
| Hexanoylcarnitine                                       | C13H25NO4    | 259.18 | 5.39  | 2.15  | 1.10  | 0.01 | 0.76 | 1.31 | up   |

|                                                                 |             |        |       |       |       |      |      |      |      |
|-----------------------------------------------------------------|-------------|--------|-------|-------|-------|------|------|------|------|
| 3-Methoxy prostaglandin F1 $\alpha$                             | C21H38O6    | 408.25 | 6.76  | 0.47  | -1.08 | 0.01 | 0.78 | 1.34 | down |
| PC (18:4e/6:0)                                                  | C32H58NO7P  | 599.40 | 10.19 | 1.72  | 0.78  | 0.01 | 0.75 | 1.36 | up   |
| FLK                                                             | C21H34N4O4  | 203.13 | 2.15  | 20.04 | 4.32  | 0.01 | 0.75 | 1.30 | up   |
| 1-Methylhistidine                                               | C7H11N3O2   | 169.09 | 1.27  | 2.76  | 1.47  | 0.01 | 0.76 | 1.31 | up   |
| WKK                                                             | C23H36N6O4  | 230.14 | 3.89  | 5.63  | 2.49  | 0.01 | 0.77 | 1.33 | up   |
| LPE 18:0                                                        | C23H48NO7P  | 481.32 | 9.98  | 1.91  | 0.93  | 0.01 | 0.76 | 1.35 | up   |
| Diacetoxyscirpenol                                              | C19H26O7    | 348.16 | 5.58  | 0.49  | -1.02 | 0.01 | 0.77 | 1.52 | down |
| L-Argininosuccinate                                             | C10H18N4O6  | 290.12 | 1.56  | 3.34  | 1.74  | 0.01 | 0.69 | 1.32 | up   |
| IRH                                                             | C18H32N8O4  | 446.24 | 5.79  | 0.48  | -1.06 | 0.02 | 0.76 | 1.43 | down |
| 2-hydroxy-6-[(8Z,11Z)-pentadeca-8,11,14-trien-1-yl]benzoic acid | C22H30O3    | 342.22 | 7.90  | 0.49  | -1.02 | 0.02 | 0.73 | 1.29 | down |
| L-Homocitrulline                                                | C7H15N3O3   | 189.11 | 1.39  | 3.43  | 1.78  | 0.02 | 0.75 | 1.32 | up   |
| H-Gly-Pro-OH                                                    | C7H12N2O3   | 172.08 | 1.39  | 3.43  | 1.78  | 0.02 | 0.75 | 1.31 | up   |
| L-Kynurenine                                                    | C10H12N2O3  | 208.08 | 4.76  | 1.98  | 0.98  | 0.02 | 0.76 | 1.27 | up   |
| SNK                                                             | C13H25N5O6  | 658.35 | 4.98  | 1.89  | 0.92  | 0.02 | 0.72 | 1.27 | up   |
| 5-Hydroxyindole-3-acetic acid                                   | C10H9NO3    | 191.06 | 4.76  | 1.98  | 0.98  | 0.02 | 0.76 | 1.26 | up   |
| MKK                                                             | C17H35N5O4S | 405.24 | 5.57  | 0.54  | -0.89 | 0.02 | 0.72 | 1.43 | down |
| Glycoursodeoxycholic acid                                       | C26H43NO5   | 449.31 | 7.33  | 0.45  | -1.15 | 0.02 | 0.79 | 1.36 | down |
| Sodium Dehydrocholate                                           | C24H33NaO5  | 424.22 | 6.63  | 0.58  | -0.80 | 0.02 | 0.77 | 1.25 | down |
| 2,4-dihydroxyheptadec-16-en-1-yl acetate                        | C19H36O4    | 368.26 | 6.64  | 0.57  | -0.81 | 0.02 | 0.79 | 1.30 | down |
| 4-Hydroxypropranolol                                            | C16H21NO3   | 275.15 | 1.32  | 1.68  | 0.75  | 0.02 | 0.78 | 1.27 | up   |
| ACar 20:4                                                       | C27H46NO4   | 447.33 | 7.05  | 1.88  | 0.91  | 0.02 | 0.76 | 1.29 | up   |
| 13-HPODE                                                        | C18H32O4    | 312.23 | 8.00  | 2.78  | 1.47  | 0.02 | 0.69 | 1.22 | up   |
| Jasmonic acid                                                   | C12H18O3    | 210.13 | 7.04  | 0.51  | -0.97 | 0.02 | 0.73 | 1.23 | down |
| PE (4:0/16:4)                                                   | C25H42NO8P  | 515.27 | 6.98  | 0.49  | -1.02 | 0.02 | 0.77 | 1.22 | down |

|                                                                      |            |        |      |       |       |      |      |      |      |
|----------------------------------------------------------------------|------------|--------|------|-------|-------|------|------|------|------|
| WLH                                                                  | C23H30N6O4 | 436.23 | 5.35 | 0.26  | -1.94 | 0.02 | 0.78 | 1.39 | down |
| Nicotinamide N-oxide                                                 | C6H6N2O2   | 138.04 | 1.81 | 0.49  | -1.02 | 0.02 | 0.72 | 1.35 | down |
| 3-N-Methyl-L-histidine                                               | C7H13N3O3  | 187.10 | 1.68 | 4.67  | 2.22  | 0.02 | 0.75 | 1.31 | up   |
| methyl 2-[(2-acetyl-3-oxo-1-butenyl)amino]acetate                    | C9H13NO4   | 199.08 | 5.13 | 7.68  | 2.94  | 0.02 | 0.79 | 1.27 | up   |
| Propionylcarnitine                                                   | C10H19NO4  | 217.13 | 2.50 | 3.38  | 1.76  | 0.03 | 0.75 | 1.24 | up   |
| N-(4-butyl-2-methylphenyl)-N'-[4-(4-methylpiperazino)phenyl]urea     | C23H32N4O  | 380.25 | 8.77 | 3.03  | 1.60  | 0.03 | 0.78 | 1.20 | up   |
| Oxaceprol                                                            | C7H11NO4   | 173.07 | 1.36 | 1.82  | 0.86  | 0.03 | 0.76 | 1.31 | up   |
| 3-hydroxy-3-methylpentanedioic acid                                  | C6H10O5    | 179.08 | 4.73 | 6.98  | 2.80  | 0.03 | 0.72 | 1.25 | up   |
| (2E)-4-Hydroxy-3,7-dimethyl-2,6-octadien-1-yl beta-D-glucopyranoside | C16H28O7   | 349.21 | 4.94 | 2.31  | 1.21  | 0.03 | 0.72 | 1.18 | up   |
| D-(+)-Maltose                                                        | C12H22O11  | 364.10 | 1.33 | 0.46  | -1.11 | 0.03 | 0.72 | 1.19 | down |
| RLH                                                                  | C18H32N8O4 | 212.13 | 4.64 | 2.75  | 1.46  | 0.03 | 0.72 | 1.22 | up   |
| Proline-hydroxyproline                                               | C10H16N2O4 | 228.11 | 5.12 | 1.77  | 0.82  | 0.03 | 0.76 | 1.25 | up   |
| PC (16:0/17:1)                                                       | C41H80NO8P | 745.56 | 8.84 | 1.78  | 0.84  | 0.03 | 0.74 | 1.34 | up   |
| Gly-Tyr-Ala                                                          | C14H19N3O5 | 309.13 | 4.61 | 2.22  | 1.15  | 0.03 | 0.74 | 1.28 | up   |
| Estrone                                                              | C18H22O2   | 287.19 | 7.93 | 0.42  | -1.25 | 0.03 | 0.72 | 1.32 | down |
| Acetyl-L-carnitine                                                   | C9H17NO4   | 203.12 | 1.79 | 1.77  | 0.83  | 0.03 | 0.74 | 1.19 | up   |
| 2-(2,4-dihydroxyphenyl)-3,5,7-trihydroxy-4H-chromen-4-one            | C15H10O7   | 302.04 | 5.47 | 0.63  | -0.66 | 0.03 | 0.69 | 1.37 | down |
| ACar 20:0                                                            | C27H54NO4  | 455.40 | 8.37 | 2.79  | 1.48  | 0.03 | 0.72 | 1.40 | up   |
| 1,4-dihydroxyheptadec-16-en-2-yl acetate                             | C19H36O4   | 328.26 | 8.89 | 15.57 | 3.96  | 0.03 | 0.67 | 1.19 | up   |
| 8-Aminooctanoic acid                                                 | C8H17NO2   | 159.13 | 1.38 | 2.10  | 1.07  | 0.03 | 0.70 | 1.16 | up   |
| D-Galactosamine                                                      | C6H14CINO5 | 215.06 | 1.31 | 0.65  | -0.62 | 0.03 | 0.74 | 1.36 | down |

|                                                           |              |        |       |      |       |      |      |      |      |
|-----------------------------------------------------------|--------------|--------|-------|------|-------|------|------|------|------|
| R-1 Methanandamide phosphate                              | C23H40NO5P   | 441.27 | 4.94  | 0.39 | -1.35 | 0.03 | 0.71 | 1.14 | down |
| LPE 15:1                                                  | C20H40NO7P   | 437.25 | 7.93  | 0.40 | -1.33 | 0.03 | 0.83 | 1.34 | down |
| 13,14-dihydro-15-keto-PGD2                                | C20H32O5     | 352.22 | 6.76  | 0.53 | -0.92 | 0.03 | 0.72 | 1.14 | down |
| Oleoyl ethylamide                                         | C20H39NO     | 309.30 | 10.47 | 1.76 | 0.81  | 0.03 | 0.69 | 1.22 | up   |
| 5-Hydroxymethylcytosine                                   | C5H7N3O2     | 141.05 | 1.81  | 2.54 | 1.34  | 0.03 | 0.69 | 1.17 | up   |
| ACar 7:0                                                  | C14H28NO4    | 273.19 | 5.51  | 3.17 | 1.67  | 0.03 | 0.70 | 1.15 | up   |
| D-Ala-D-Ala                                               | C6H12N2O3    | 160.09 | 1.38  | 1.89 | 0.92  | 0.03 | 0.69 | 1.20 | up   |
| 3-(propan-2-yl)-octahydropyrrolo[1,2-a]pyrazine-1,4-dione | C10H16N2O2   | 196.12 | 5.25  | 1.99 | 0.99  | 0.04 | 0.73 | 1.22 | up   |
| 1-Methylnicotinamide                                      | C7H8N2O      | 154.07 | 1.30  | 1.71 | 0.77  | 0.04 | 0.76 | 1.22 | up   |
| 2-Linoleoyl glycerol                                      | C21H38O4     | 336.26 | 10.15 | 2.20 | 1.14  | 0.04 | 0.72 | 1.14 | up   |
| Tauro-alpha-Muricholic acid sodium salt                   | C26H44NNaO7S | 537.27 | 6.78  | 2.79 | 1.48  | 0.04 | 0.59 | 1.31 | up   |
| Oleoyl ethanolamide                                       | C20H39NO2    | 325.30 | 9.58  | 1.87 | 0.90  | 0.04 | 0.72 | 1.16 | up   |
| Oxohongdenafil                                            | C25H32N6O4   | 480.26 | 5.40  | 0.44 | -1.19 | 0.04 | 0.74 | 1.28 | down |
| Glycolithocholic acid                                     | C26H43NO4    | 433.32 | 9.10  | 8.07 | 3.01  | 0.04 | 0.68 | 1.12 | up   |
| Nobiletin                                                 | C21H22O8     | 402.13 | 6.43  | 0.51 | -0.97 | 0.04 | 0.70 | 1.12 | down |
| PC (20:4e/2:0)                                            | C30H54NO7P   | 571.36 | 9.30  | 1.70 | 0.77  | 0.04 | 0.75 | 1.22 | up   |
| ACar 13:0                                                 | C20H40NO4    | 357.29 | 6.44  | 0.61 | -0.71 | 0.04 | 0.68 | 1.14 | down |
| β-Nicotinamide mononucleotide                             | C11H15N2O8P  | 334.06 | 1.38  | 0.42 | -1.27 | 0.05 | 0.76 | 1.23 | down |
| LPE 16:1                                                  | C21H42NO7P   | 451.27 | 8.54  | 0.40 | -1.33 | 0.05 | 0.67 | 1.25 | down |
| 3-amino-2-phenyl-2H-pyrazolo[4,3-c]pyridine-4,6-diol      | C12H10N4O2   | 242.08 | 5.79  | 1.52 | 0.61  | 0.05 | 0.73 | 1.23 | up   |
| 6??-Hydroxytestosterone                                   | C19H28O3     | 304.20 | 7.83  | 2.32 | 1.22  | 0.05 | 0.73 | 1.09 | up   |
| Heptadecanoic Acid                                        | C17H34O2     | 292.24 | 8.08  | 0.64 | -0.65 | 0.05 | 0.74 | 1.13 | down |
