# Supplementary material for: Identification of Canine Pyometra-Associated Metabolites Using Untargeted Metabolomics
Source: MDPI journal article supplement (doi:10.3390/ijms232214161), 2022-11-16
Supplement: s1 [file s1]

**Table S5** The clinical information of diseased dogs with pyometra and healthy dogs.

| Health status of dogs | Endometrial tissue | Breed                | Lineage | Somatotype | Age (years) |
|-----------------------|--------------------|----------------------|---------|------------|-------------|
| Cannine pyometra      | PP001              | Samoyed              | Pure    | Medium     | 10          |
| Cannine pyometra      | PP002              | Poodle               | Pure    | Small      | 16          |
| Cannine pyometra      | PP003              | Poodle               | Pure    | Small      | 2           |
| Cannine pyometra      | PP004              | Teddydog             | Pure    | Small      | 12          |
| Cannine pyometra      | PP005              | Cocker               | Pure    | Small      | 11          |
| Cannine pyometra      | PP006              | Bobbie               | Pure    | Small      | 10          |
| Cannine pyometra      | PP007              | Border Collie        | Pure    | Medium     | 4           |
| Cannine pyometra      | PP008              | Italian Greyhound    | Pure    | Small      | 9           |
| Cannine pyometra      | PP009              | Teddydog             | Pure    | Small      | 8           |
| Cannine pyometra      | PP010              | Pomeranian           | Pure    | Small      | 12          |
| Cannine pyometra      | PP011              | Teddydog             | Pure    | Small      | 7           |
| Cannine pyometra      | PP012              | Old English Sheepdog | Pure    | Large      | 9           |
| Cannine pyometra      | PP013              | Teddydog             | Pure    | Small      | 10          |
| Cannine pyometra      | PP014              | Teddydog             | Pure    | Small      | 8           |
| Cannine pyometra      | PP015              | Golden retriever     | Pure    | Large      | 12          |
| Heathy                | HD001              | Pomeranian           | Pure    | Small      | 11          |
| Heathy                | HD002              | Schnauzer            | Pure    | Small      | 3           |
| Heathy                | HD003              | Poodle               | Pure    | Small      | 8           |
| Heathy                | HD004              | Pomeranian           | Pure    | Small      | 8           |
| Heathy                | HD005              | Teddydog             | Pure    | Small      | 7           |
| Heathy                | HD006              | Samoyed              | Pure    | Medium     | 6           |
| Heathy                | HD007              | Teddydog             | Pure    | Small      | 8           |
| Heathy                | HD008              | Teddydog             | Pure    | Small      | 8           |
| Heathy                | HD009              | Teddydog             | Pure    | Small      | 12          |
| Heathy                | HD010              | Teddydog             | Pure    | Small      | 4           |
| Heathy                | HD011              | Border Collie        | Pure    | Medium     | 9           |
| Heathy                | HD012              | Pomeranian           | Pure    | Small      | 11          |
| Heathy                | HD013              | Border Collie        | Pure    | Medium     | 9           |
| Heathy                | HD014              | Teddydog             | Pure    | Small      | 10          |
| Heathy                | HD015              | Teddydog             | Pure    | Small      | 9           |
