# Supplementary material for: Identification of Canine Pyometra-Associated Metabolites Using Untargeted Metabolomics
Source: MDPI journal article supplement (doi:10.3390/ijms232214161), 2022-11-16
Supplement: s1 [file s1]

**Table S3.** The enriched pathways of differential endometrial metabolism in the positive ionization mode.

| Map Title                               | P value | x | y | n  | N   | Enrich Direct | Meta IDs                                                   |
|-----------------------------------------|---------|---|---|----|-----|---------------|------------------------------------------------------------|
| Galactose metabolism                    | 0.029   | 2 | 2 | 20 | 114 | Over          | D-Galactosamine; D-Fructose 6-phosphate                    |
| cAMP signaling pathway                  | 0.079   | 2 | 3 | 20 | 114 | Over          | Acetylcholine; L-Adrenaline                                |
| Glycerophospholipid metabolism          | 0.141   | 2 | 4 | 20 | 114 | Over          | Acetylcholine; Phosphoethanolamine                         |
| Nicotinate and nicotinamide metabolism  | 0.141   | 2 | 4 | 20 | 114 | Over          | 1-Methylnicotinamide; $\beta$ -Nicotinamide mononucleotide |
| Starch and sucrose metabolism           | 0.175   | 1 | 1 | 20 | 114 | Over          | D-Fructose 6-phosphate                                     |
| alpha-Linolenic acid metabolism         | 0.175   | 1 | 1 | 20 | 114 | Over          | Jasmonic acid                                              |
| Sphingolipid metabolism                 | 0.175   | 1 | 1 | 20 | 114 | Over          | Phosphoethanolamine                                        |
| Riboflavin metabolism                   | 0.175   | 1 | 1 | 20 | 114 | Over          | Riboflavin                                                 |
| AMPK signaling pathway                  | 0.175   | 1 | 1 | 20 | 114 | Over          | D-Fructose 6-phosphate                                     |
| Adrenergic signaling in cardiomyocytes  | 0.175   | 1 | 1 | 20 | 114 | Over          | L-Adrenaline                                               |
| Synaptic vesicle cycle                  | 0.175   | 1 | 1 | 20 | 114 | Over          | Acetylcholine                                              |
| Regulation of actin cytoskeleton        | 0.175   | 1 | 1 | 20 | 114 | Over          | Acetylcholine                                              |
| Insulin secretion                       | 0.175   | 1 | 1 | 20 | 114 | Over          | Acetylcholine                                              |
| Glucagon signaling pathway              | 0.175   | 1 | 1 | 20 | 114 | Over          | D-Fructose 6-phosphate                                     |
| Insulin resistance                      | 0.175   | 1 | 1 | 20 | 114 | Over          | D-Fructose 6-phosphate                                     |
| Salivary secretion                      | 0.175   | 1 | 1 | 20 | 114 | Over          | Acetylcholine                                              |
| Gastric acid secretion                  | 0.175   | 1 | 1 | 20 | 114 | Over          | Acetylcholine                                              |
| Pancreatic secretion                    | 0.175   | 1 | 1 | 20 | 114 | Over          | Acetylcholine                                              |
| Nicotine addiction                      | 0.175   | 1 | 1 | 20 | 114 | Over          | Acetylcholine                                              |
| African trypanosomiasis                 | 0.175   | 1 | 1 | 20 | 114 | Over          | L-Kynurenine                                               |
| Neuroactive ligand-receptor interaction | 0.192   | 3 | 9 | 20 | 114 | Over          | UDP; Acetylcholine; L-Adrenaline                           |
| Tryptophan metabolism                   | 0.211   | 2 | 5 | 20 | 114 | Over          | Kynurenic acid; L-Kynurenine                               |

|                                             |       |    |    |    |     |      |                                                                                                                                                                                                                                                                                     |
|---------------------------------------------|-------|----|----|----|-----|------|-------------------------------------------------------------------------------------------------------------------------------------------------------------------------------------------------------------------------------------------------------------------------------------|
| Vitamin B6 metabolism                       | 0.321 | 1  | 2  | 20 | 114 | Over | Pyridoxine                                                                                                                                                                                                                                                                          |
| Carbon metabolism                           | 0.321 | 1  | 2  | 20 | 114 | Over | D-Fructose 6-phosphate                                                                                                                                                                                                                                                              |
| Sphingolipid signaling pathway              | 0.321 | 1  | 2  | 20 | 114 | Over | Phosphoethanolamine                                                                                                                                                                                                                                                                 |
| Cholinergic synapse                         | 0.321 | 1  | 2  | 20 | 114 | Over | Acetylcholine                                                                                                                                                                                                                                                                       |
| Taste transduction                          | 0.321 | 1  | 2  | 20 | 114 | Over | Acetylcholine                                                                                                                                                                                                                                                                       |
| Prolactin signaling pathway                 | 0.321 | 1  | 2  | 20 | 114 | Over | Estrone                                                                                                                                                                                                                                                                             |
| Renin secretion                             | 0.321 | 1  | 2  | 20 | 114 | Over | L-Adrenaline                                                                                                                                                                                                                                                                        |
| Central carbon metabolism in cancer         | 0.321 | 1  | 2  | 20 | 114 | Over | D-Fructose 6-phosphate                                                                                                                                                                                                                                                              |
| Alanine, aspartate and glutamate metabolism | 0.443 | 1  | 3  | 20 | 114 | Over | L-Argininosuccinate                                                                                                                                                                                                                                                                 |
| Regulation of lipolysis in adipocytes       | 0.443 | 1  | 3  | 20 | 114 | Over | L-Adrenaline                                                                                                                                                                                                                                                                        |
| Arginine biosynthesis                       | 0.543 | 1  | 4  | 20 | 114 | Over | L-Argininosuccinate                                                                                                                                                                                                                                                                 |
| Purine metabolism                           | 0.543 | 1  | 4  | 20 | 114 | Over | Deoxyadenosine                                                                                                                                                                                                                                                                      |
|                                             |       |    |    |    |     |      | Kynurenic acid; Pyridoxine; UDP; 4-Guanidinobutyric acid; Riboflavin; Phosphoethanolamine; 1-Methylnicotinamide; D-Ala-D-Ala; L-Adrenaline; D-Fructose 6-phosphate; L-Kynurenine; $\beta$ -Nicotinamide mononucleotide; Estrone; L-Argininosuccinate; Jasmonic acid; Deoxyadenosine |
| Metabolic pathways                          | 0.603 | 16 | 83 | 20 | 114 | Over |                                                                                                                                                                                                                                                                                     |
| Lysine degradation                          | 1     | 1  | 5  | 20 | 114 | Over | N6,N6,N6-Trimethyl-L-lysine                                                                                                                                                                                                                                                         |
| Histidine metabolism                        | 1     | 1  | 5  | 20 | 114 | Over | 1-Methylhistidine                                                                                                                                                                                                                                                                   |
| Tyrosine metabolism                         | 1     | 1  | 5  | 20 | 114 | Over | L-Adrenaline                                                                                                                                                                                                                                                                        |
| Ovarian steroidogenesis                     | 1     | 1  | 5  | 20 | 114 | Over | Estrone                                                                                                                                                                                                                                                                             |

---

Map Title: Enriched KEGG pathway name; P value: P value of enrichment analysis; X: Number of differential metabolites associated with this pathway; y: Number of background (all) metabolites associated with this pathway; n: Number of differential metabolites annotated by KEGG; N: Number of background (all) metabolites of KEGG annotation; Enrich Direct: Enrichment direction, Over represents enrichment, i.e.  $x/n > y/N$ ; Meta IDs: List of enriched metabolites.
