# Supplementary material for: Identification of Canine Pyometra-Associated Metabolites Using Untargeted Metabolomics
Source: MDPI journal article supplement (doi:10.3390/ijms232214161), 2022-11-16
Supplement: s1 [file s1]

**Table S2.** Differential metabolites identified in negative ion mode of endometrium of diseased and healthy dogs.

| Name                        | Formula    | Molecular Weight | RT [min] | FC   | log2FC | P-value | ROC  | VIP  | Up/Down |
|-----------------------------|------------|------------------|----------|------|--------|---------|------|------|---------|
| Levodopa                    | C9H11NO4   | 197.07           | 2.45     | 0.29 | -1.80  | 0.00    | 0.94 | 2.23 | down    |
| D-Ribulose 5-phosphate      | C5H11O8P   | 230.02           | 1.51     | 0.46 | -1.11  | 0.00    | 0.93 | 2.03 | down    |
| Phe-Pro                     | C14H18N2O3 | 262.13           | 5.17     | 4.55 | 2.19   | 0.00    | 0.92 | 2.08 | up      |
| D-Glucose 6-phosphate       | C6H13O9P   | 260.03           | 1.51     | 0.33 | -1.58  | 0.00    | 0.90 | 1.84 | down    |
| (R)-3-Hydroxy myristic acid | C14H28O3   | 244.20           | 8.11     | 1.71 | 0.77   | 0.00    | 0.88 | 1.79 | up      |
| Lauric acid ethyl ester     | C14H28O2   | 228.21           | 9.31     | 2.28 | 1.19   | 0.00    | 0.89 | 1.76 | up      |
| Prolylleucine               | C11H20N2O3 | 228.15           | 5.10     | 4.24 | 2.08   | 0.00    | 0.87 | 1.70 | up      |
| Vitamin B2                  | C17H20N4O6 | 376.14           | 9.31     | 1.76 | 0.82   | 0.00    | 0.86 | 1.69 | up      |
| Hypoxanthine                | C5H4N4O    | 136.04           | 2.00     | 0.63 | -0.66  | 0.00    | 0.87 | 1.64 | down    |
| D-(-)-Fructose              | C6H12O6    | 180.06           | 1.24     | 0.54 | -0.89  | 0.00    | 0.86 | 1.63 | down    |
| L-Threonic acid             | C4H8O5     | 136.04           | 1.34     | 0.52 | -0.95  | 0.00    | 0.84 | 1.71 | down    |
| D-Sedoheptulose 7-phosphate | C7H15O10P  | 290.04           | 1.51     | 0.53 | -0.92  | 0.00    | 0.84 | 1.67 | down    |
| 2-deoxyglucose-6-phosphate  | C6H13O8P   | 244.03           | 1.52     | 0.55 | -0.87  | 0.00    | 0.84 | 1.65 | down    |
| N-Acetyl-L-methionine       | C7H13NO3S  | 191.06           | 5.26     | 0.62 | -0.68  | 0.00    | 0.82 | 1.94 | down    |
| (5-L-Glutamyl)-L-Amino Acid | C8H14N2O5  | 218.09           | 1.38     | 2.64 | 1.40   | 0.00    | 0.84 | 1.57 | up      |
| Prostaglandin H2            | C20H32O5   | 334.21           | 7.61     | 2.10 | 1.07   | 0.00    | 0.84 | 1.56 | up      |
| Kaempferitrin               | C27H30O14  | 624.17           | 9.08     | 0.42 | -1.23  | 0.00    | 0.82 | 1.55 | down    |
| N-Acetylaspartic acid       | C6H9NO5    | 175.05           | 1.94     | 0.34 | -1.57  | 0.00    | 0.81 | 1.65 | down    |
| LPC 24:4                    | C32H58NO7P | 645.40           | 9.98     | 3.05 | 1.61   | 0.00    | 0.80 | 1.55 | up      |
| 2-Hydroxycaproic acid       | C6H12O3    | 132.08           | 5.64     | 3.10 | 1.63   | 0.00    | 0.81 | 1.51 | up      |
| Cholic acid                 | C24H40O5   | 408.29           | 7.15     | 2.88 | 1.53   | 0.00    | 0.83 | 1.49 | up      |
| LPC 22:4                    | C30H54NO7P | 617.37           | 9.28     | 2.22 | 1.15   | 0.00    | 0.82 | 1.49 | up      |

|                                  |             |        |      |       |       |      |      |      |      |
|----------------------------------|-------------|--------|------|-------|-------|------|------|------|------|
| trans-Cinnamic acid              | C9H8O2      | 148.05 | 5.65 | 8.84  | 3.14  | 0.00 | 0.79 | 1.51 | up   |
| N-(5-Aminopentyl)acetamide       | C7H16N2O    | 144.13 | 5.05 | 2.01  | 1.01  | 0.00 | 0.81 | 1.53 | up   |
| (2-anilino-4-methyl-1,3-thiazol- | C18H16N2O2S | 324.10 | 4.94 | 5.67  | 2.50  | 0.00 | 0.74 | 1.51 | up   |
| Phosphocholine                   | C5H15ClNO4  | 219.04 | 1.43 | 0.57  | -0.81 | 0.00 | 0.80 | 1.42 | down |
| o-Toluic Acid                    | C8H8O2      | 136.05 | 5.17 | 5.93  | 2.57  | 0.00 | 0.79 | 1.42 | up   |
| DL-4-Hydroxyphenyllactic acid    | C9H10O4     | 182.06 | 5.17 | 5.99  | 2.58  | 0.00 | 0.80 | 1.42 | up   |
| lipoamide                        | C8H15NOS2   | 205.06 | 5.24 | 0.40  | -1.31 | 0.00 | 0.83 | 1.38 | down |
| Azelaic acid                     | C9H16O4     | 188.11 | 5.79 | 1.75  | 0.81  | 0.00 | 0.80 | 1.43 | up   |
| Nicotinamide adenine             | C21H28N7O17 | 743.08 | 1.87 | 0.66  | -0.59 | 0.00 | 0.83 | 1.38 | down |
| L-threo-3-Phenylserine           | C9H11NO3    | 181.07 | 5.49 | 0.34  | -1.55 | 0.00 | 0.78 | 1.43 | down |
| 9-HpOTrE                         | C18H30O4    | 310.21 | 7.61 | 2.79  | 1.48  | 0.00 | 0.83 | 1.35 | up   |
| 4-[2-(2-oxo-1-                   | C9H17N3O3S  | 248.10 | 1.37 | 2.29  | 1.19  | 0.00 | 0.80 | 1.39 | up   |
| Ala-trp                          | C14H17N3O3  | 275.13 | 5.18 | 3.09  | 1.63  | 0.01 | 0.78 | 1.44 | up   |
| N-Acetyl-aspartic acid           | C6H9NO5     | 175.05 | 1.47 | 0.44  | -1.17 | 0.01 | 0.78 | 1.51 | down |
| Glutaric Acid                    | C5H8O4      | 132.04 | 1.31 | 0.42  | -1.24 | 0.01 | 0.78 | 1.44 | down |
| (±)12(13)-DiHOME                 | C18H34O4    | 314.25 | 8.39 | 6.65  | 2.73  | 0.01 | 0.80 | 1.39 | up   |
| Glycocholic acid hydrate         | C26H45NO7   | 483.32 | 6.49 | 2.41  | 1.27  | 0.01 | 0.79 | 1.39 | up   |
| 2-Hydroxy-4-                     | C5H10O3S    | 150.04 | 5.22 | 11.53 | 3.53  | 0.01 | 0.78 | 1.40 | up   |
| Monobutyl phthalate              | C12H14O4    | 222.09 | 6.21 | 2.00  | 1.00  | 0.01 | 0.81 | 1.49 | up   |
| Hexadecanedioic acid             | C16H30O4    | 286.21 | 7.59 | 4.08  | 2.03  | 0.01 | 0.76 | 1.34 | up   |
| Mag (18:1)                       | C21H40O4    | 356.29 | 9.63 | 1.76  | 0.82  | 0.01 | 0.77 | 1.34 | up   |
| Dihydroxyacetone phosphate       | C3H7O6P     | 170.00 | 1.51 | 0.45  | -1.14 | 0.01 | 0.78 | 1.33 | down |
| Propionyl-L-carnitine            | C10H19NO4   | 217.13 | 5.87 | 2.38  | 1.25  | 0.01 | 0.79 | 1.31 | up   |
| Ouabain                          | C29H44O12   | 584.28 | 4.93 | 0.43  | -1.22 | 0.01 | 0.79 | 1.31 | down |

|                                          |            |        |       |       |       |      |      |      |      |
|------------------------------------------|------------|--------|-------|-------|-------|------|------|------|------|
| 1-Palmitoyl-Sn-Glycero-3-LPC 17:0        | C24H50NO7P | 495.33 | 9.59  | 1.56  | 0.64  | 0.01 | 0.77 | 1.31 | up   |
| Hydroxyglutaric acid                     | C5H8O5     | 148.04 | 1.45  | 0.37  | -1.42 | 0.01 | 0.76 | 1.41 | down |
| Cynaropicrin                             | C19H22O6   | 392.14 | 6.17  | 1.97  | 0.98  | 0.01 | 0.80 | 1.28 | up   |
| (3R)-8-hydroxy-3-(4-Indole-3-lactic acid | C16H14O4   | 270.09 | 5.30  | 0.32  | -1.63 | 0.01 | 0.78 | 1.33 | down |
| Thymidine                                | C11H11NO3  | 205.07 | 5.58  | 3.63  | 1.86  | 0.01 | 0.73 | 1.35 | up   |
| Dodecanedioic acid                       | C12H22O4   | 230.15 | 6.40  | 1.97  | 0.98  | 0.01 | 0.80 | 1.36 | up   |
| O-Phosphorylethanolamine                 | C2H8NO4P   | 141.02 | 1.28  | 0.63  | -0.66 | 0.01 | 0.75 | 1.34 | down |
| FAHFA (22:4/3:0)                         | C25H40O4   | 404.29 | 10.76 | 4.00  | 2.00  | 0.01 | 0.76 | 1.31 | up   |
| Delta-Tridecalactone                     | C13H24O2   | 212.18 | 6.69  | 1.92  | 0.94  | 0.01 | 0.77 | 1.27 | up   |
| (±)19(20)-DiHDPA                         | C22H34O4   | 362.25 | 8.24  | 1.71  | 0.77  | 0.01 | 0.79 | 1.27 | up   |
| α-D-Glucose-1,6-bisphosphate             | C6H14O12P2 | 340.00 | 2.29  | 0.39  | -1.35 | 0.01 | 0.76 | 1.35 | down |
| Uridine                                  | C9H12N2O6  | 244.07 | 2.27  | 0.55  | -0.85 | 0.01 | 0.76 | 1.27 | down |
| H-Tyr(3-I)-OH                            | C9H10INO3  | 306.97 | 5.10  | 0.50  | -0.99 | 0.01 | 0.76 | 1.29 | down |
| DL-Citrulline                            | C6H13N3O3  | 175.10 | 1.55  | 12.03 | 3.59  | 0.01 | 0.73 | 1.26 | up   |
| 15(R),19(R)-Hydroxy                      | C20H34O6   | 406.21 | 6.29  | 0.55  | -0.86 | 0.01 | 0.74 | 1.37 | down |
| Homovanillic acid                        | C9H10O4    | 182.06 | 5.69  | 4.96  | 2.31  | 0.01 | 0.76 | 1.39 | up   |
| 8-Isoprostaglandin F1β                   | C20H36O5   | 356.26 | 8.35  | 3.54  | 1.82  | 0.01 | 0.79 | 1.24 | up   |
| OxPC (18:1-18:2+2O)                      | C44H82NO10 | 861.57 | 11.09 | 2.65  | 1.40  | 0.01 | 0.77 | 1.21 | up   |
| 6-Phosphogluconic acid                   | C6H13O10P  | 276.02 | 1.56  | 0.54  | -0.88 | 0.01 | 0.76 | 1.25 | down |
| Arachidonic acid                         | C20H32O2   | 304.24 | 9.73  | 0.66  | -0.60 | 0.01 | 0.75 | 1.28 | down |
| Phenylpyruvic acid                       | C9H8O3     | 164.05 | 5.17  | 3.88  | 1.96  | 0.02 | 0.76 | 1.26 | up   |
| 4-Methylvaleric Acid                     | C6H12O2    | 116.08 | 5.80  | 1.77  | 0.82  | 0.02 | 0.74 | 1.18 | up   |

|                             |             |        |       |       |       |      |      |      |      |
|-----------------------------|-------------|--------|-------|-------|-------|------|------|------|------|
| 3-(methylsulfanyl)-5H-      | C10H8N4S    | 216.05 | 5.23  | 2.50  | 1.32  | 0.02 | 0.74 | 1.26 | up   |
| Salicylic acid              | C7H6O3      | 138.03 | 5.96  | 2.25  | 1.17  | 0.02 | 0.77 | 1.19 | up   |
| 2-Methoxyestradiol          | C19H26O3    | 302.18 | 5.73  | 2.19  | 1.13  | 0.02 | 0.74 | 1.35 | up   |
| LPC 18:0                    | C26H54NO7P  | 523.36 | 9.99  | 1.51  | 0.59  | 0.02 | 0.75 | 1.26 | up   |
| Traumatic acid              | C12H20O4    | 228.14 | 6.25  | 1.60  | 0.68  | 0.02 | 0.72 | 1.31 | up   |
| Lysopc 17:0                 | C25H52NO7P  | 509.35 | 10.00 | 1.52  | 0.61  | 0.02 | 0.75 | 1.26 | up   |
| Thromboxane B2              | C20H34O6    | 370.24 | 6.29  | 0.63  | -0.67 | 0.02 | 0.74 | 1.27 | down |
| 16-Hydroxyhexadecanoic acid | C16H32O3    | 254.22 | 9.55  | 2.10  | 1.07  | 0.02 | 0.76 | 1.28 | up   |
| gamma-Glutamylmethionine    | C10H18N2O5S | 278.09 | 4.85  | 2.21  | 1.14  | 0.02 | 0.74 | 1.18 | up   |
| Mycophenolic acid           | C17H20O6    | 320.12 | 5.64  | 5.22  | 2.38  | 0.02 | 0.71 | 1.19 | up   |
| 4-oxo-4,5,6,7-              | C9H8O4      | 180.04 | 5.47  | 4.85  | 2.28  | 0.02 | 0.71 | 1.27 | up   |
| 2-Hydroxyestradiol          | C18H24O3    | 288.17 | 5.56  | 2.66  | 1.41  | 0.02 | 0.69 | 1.18 | up   |
| Deoxyguanosine              | C10H13N5O4  | 267.10 | 2.87  | 0.64  | -0.65 | 0.03 | 0.76 | 1.13 | down |
| 4-Guanidinobutanoate        | C5H11N3O2   | 145.09 | 1.76  | 26.95 | 4.75  | 0.03 | 0.60 | 1.15 | up   |
| OxPC (18:1-18:1+1O(1Cyc))   | C44H82NO9P  | 845.58 | 11.66 | 3.57  | 1.84  | 0.03 | 0.74 | 1.18 | up   |
| N-Acetyl-L-tyrosine         | C11H13NO4   | 223.08 | 5.18  | 1.52  | 0.61  | 0.03 | 0.72 | 1.23 | up   |
| Sepiapterin                 | C9H11N5O3   | 237.08 | 1.38  | 0.14  | -2.81 | 0.03 | 0.84 | 1.64 | down |
| Phosphoenolpyruvic acid     | C3H5O6P     | 167.98 | 1.84  | 0.34  | -1.57 | 0.03 | 0.75 | 1.15 | down |
| 10-Undecenoic acid          | C11H20O2    | 184.15 | 6.25  | 1.74  | 0.80  | 0.03 | 0.72 | 1.08 | up   |
| 19(R)-Hydroxy prostaglandin | C20H36O6    | 372.25 | 6.19  | 0.46  | -1.13 | 0.03 | 0.71 | 1.41 | down |
| 4-Methylphenol              | C7H8O       | 108.06 | 5.03  | 12.13 | 3.60  | 0.03 | 0.75 | 1.29 | up   |
| LPC 20:2                    | C28H54NO7P  | 593.37 | 9.44  | 1.54  | 0.62  | 0.03 | 0.74 | 1.35 | up   |
| D-Glucuronic acid           | C6H10O7     | 194.04 | 5.22  | 2.84  | 1.50  | 0.03 | 0.66 | 1.14 | up   |
| DI-3-Hydroxynorvaline       | C5H11NO3    | 133.07 | 1.37  | 23.86 | 4.58  | 0.04 | 0.60 | 1.08 | up   |

|                            |             |        |       |      |       |      |      |      |      |
|----------------------------|-------------|--------|-------|------|-------|------|------|------|------|
| $\alpha,\alpha$ -Trehalose | C12H22O11   | 342.12 | 1.33  | 0.58 | -0.78 | 0.04 | 0.74 | 1.13 | down |
| 3-amino-1H-pyrazolo[4,3-   | C6H6N4O2    | 166.05 | 10.99 | 1.95 | 0.96  | 0.04 | 0.77 | 1.23 | up   |
| OxPC (18:0-18:2+2O)        | C44H84NO10  | 863.59 | 11.36 | 2.63 | 1.40  | 0.04 | 0.70 | 1.12 | up   |
| 3-Phosphoglyceric acid     | C3H7O7P     | 185.99 | 4.79  | 0.58 | -0.79 | 0.04 | 0.72 | 1.02 | down |
| Glycerol 3-phosphate       | C3H9O6P     | 172.01 | 1.32  | 0.46 | -1.12 | 0.05 | 0.80 | 1.14 | down |
| O1-morpholinocarbonyl-3-   | C13H14F3N3O | 363.10 | 5.44  | 0.46 | -1.13 | 0.05 | 0.68 | 1.02 | down |
| Reserpine                  | C33H40N2O9  | 608.28 | 5.24  | 0.45 | -1.16 | 0.05 | 0.68 | 1.02 | down |
| Ursolic acid               | C30H48O3    | 456.36 | 9.24  | 2.86 | 1.51  | 0.05 | 0.86 | 1.11 | up   |

---
